# Supplementary material
Source: MDPI journal article supplement (https://www.mdpi.com/2073-4395/13/2/592)
Supplement: s1 [file s1]

# Assessment of Efficacy and Mechanism of Resistance to Soil-Applied PPO Inhibitors in *Amaranthus palmeri*

Gulab Rangani <sup>1,\*</sup>, Aimone Porri <sup>2</sup>, Reiofeli A. Salas-Perez <sup>1,†</sup>, Jens Lerchl <sup>2</sup>, Srikanth Kumar Karaikal <sup>1</sup>, Juan Camilo Velásquez <sup>1</sup> and Nilda Roma-Burgos <sup>1,\*</sup>

<sup>1</sup> Department of Crop, Soil, and Environmental Sciences, University of Arkansas, Fayetteville, AR 72704, USA

<sup>2</sup> BASF SE, Agricultural Research Station 67117, Limburgerhof, Germany

\* Correspondence: grangani@uark.edu (G.R.); nburgos@uark.edu (N.R.-B.); Tel.: +1-(479)-236-5194 (G.R.); +1-(479)-530-8987 (N.R.-B.)

† Present address: Dole Philippines, Inc., Polomolok, 9504 South Cotabato, Philippines.

Supplementary Data:

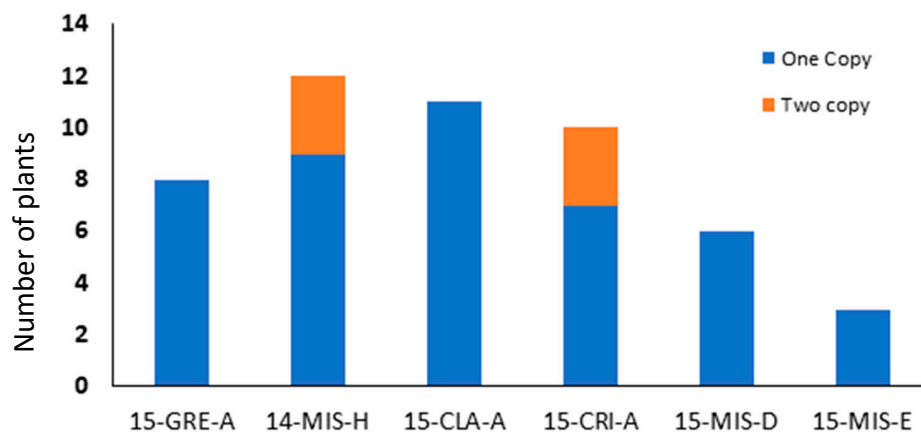

Figure S1. Copy number of *PPO2* gene in survivors from 1x soil-applied fomesafen treatment. On the y-axis is the number of plants used from each resistant population to show the copy number of *PPO2* gene, and on the x-axis are the six resistant populations selected for analysis.

Table S1. Common, trade names, and manufacturers of herbicides used in the study.

| Common name   | Trade           | Rate*<br>(g ai ha <sup>-1</sup> ) | Company                                                |
|---------------|-----------------|-----------------------------------|--------------------------------------------------------|
| fomesafen     | Reflex 2SL      | 280                               | Syngenta Crop Protection, LLC,<br>Greensboro, NC 27419 |
| flumioxazin   | Valor SX 51 WDG | 70.6                              | Valent USA Corporation, Walnut Creek,<br>CA            |
| saflufenacil  | Sharpen 4F      | 49.3                              | FMC Corporation, Philadelphia, PA<br>19103             |
| sulfentrazone | Spartan 4F      | 280                               | FMC Corporation, Philadelphia, PA<br>19103             |
| oxyfluorfen   | GoalTender 4E   | 280                               | Dow AgroSciences LLC, Indianapolis,<br>IN 46268        |

\*Herbicide solutions were prepared using tap water (from the city water supply of Northwest Arkansas) to get the corresponding recommended concentration.

Table S2. List of primers used in the copy number and expression assay.

| Name        | Sequence                    | Fluorescent dye for qPCR probe | Experiment           |
|-------------|-----------------------------|--------------------------------|----------------------|
| ApCNF1      | TCCCATGGTTTGAATGTGAC        |                                | Copy number analysis |
| ApCNR1      | TAGTATTTGCCCCCTCATCC        |                                | Copy number analysis |
| ActinF      | GCGGAAAGCTAAGCGTGAAC        |                                | Expression analysis  |
| ActinR      | TCAGACCTGCTCTGGAGTCA        |                                | Expression analysis  |
| Actin-probe | GGAGGAAAAGGCGGATGCTGCA      | Hex/BMN-Q535                   | Expression analysis  |
| PPO2F       | TTGGCTCYGTGYTYGCTGGA        |                                | Expression analysis  |
| PPO2R       | RCGTACRCRAGGCTTCTTGA        |                                | Expression analysis  |
| PPO2-probe  | AGGAAAAGGGTGGVGGARARRATGCT  | Fam / BMN-Q535                 | Expression analysis  |
| PPO1F       | CTCCACCCCCTCGAGACCCC        |                                | Expression analysis  |
| PPO1R       | TGCCAAGCCTAGCAGCAATGG       |                                | Expression analysis  |
| PPO1-probe  | CGCCTTCCTAAACCTAAGGGCCAGACT | ROX / BMN-590                  | Expression analysis  |

Table S3. Comparison of frequency of two resistant allele with the frequency of survivors to soil-applied fomesafen (1x) among six resistant *A. palmeri* population

| Group | Population | % Frequency <sup>†</sup> |                      | % Emergence <sup>††</sup> |
|-------|------------|--------------------------|----------------------|---------------------------|
|       |            | Two resistant allele     | One resistant allele |                           |
| One   | 15-GRE-A   | 100                      | 0                    | 29                        |
|       | 14-MIS-H   | 83                       | 17                   | 17                        |
|       | 15-CLA-A   | 85                       | 15                   | 16                        |
| Two   | 15-CRI-A   | 50                       | 50                   | 8                         |
|       | 15-MIS-D   | 36                       | 64                   | 6                         |
|       | 15-MIS-E   | 50                       | 50                   | 9                         |

  

| Level             | Least Sq Mean |
|-------------------|---------------|
| Group One * (%) A | 20.6          |
| Group Two (%) B   | 7.6           |

\*Levels not connected by the same letter are significantly different by Student's T-test at 95% of confidence. P- value 0.0382 (n=3).

<sup>†</sup> The number of plants in Table 2 were converted to % as plants carrying two resistant alleles (cells highlighted in blue) and plants carrying one resistant allele (rest of the plants) from total number from each population.

<sup>††</sup> Seedlings were counted 21 days after treatment (DAT) and emergence was expressed as percent emergence relative to the corresponding non-treated trays.

Table S4. Comparison between frequency of survivors with foliar- and soil-applied fomesafen (1x).

| Population                       | Fomesafen<br>Foliar-applied*<br>(%) | Fomesafen<br>Soil-applied**<br>(%) |
|----------------------------------|-------------------------------------|------------------------------------|
| 15-GRE-A                         | 77                                  | 17                                 |
| 14-MIS-H                         | 53                                  | 26                                 |
| 15-CLA-A                         | 38                                  | 37                                 |
| 15-CRI-A                         | 60                                  | 11                                 |
| 15-MIS-D                         | 42                                  | 10                                 |
| 15-MIS-E                         | 35                                  | 11                                 |
| LSD <sub>0.05</sub> <sup>a</sup> | 20.2                                |                                    |

\*Data derived from Salas-Perez et al., 2017.

\*\*Data derived from Table S3 by converting %seedling emergence reduction to %emergence

<sup>a</sup> Student's T-test LSD to compare populations between folia-applied and soil-applied treatment at 95% of confidence. P- value 0.00009 (n=6).
